# Supplementary material
Source: PubMed Central journal article supplement (PMC8281334)

## Supplemental Data

### Behavioral Correlates of Activity

### in Identified Hypocretin/Orexin Neurons

Boris Y. Mileykovskiy,  
Lyudmila I. Kiyashchenko,  
and Jerome M. Siegel

Figure S1. Composite Electrode

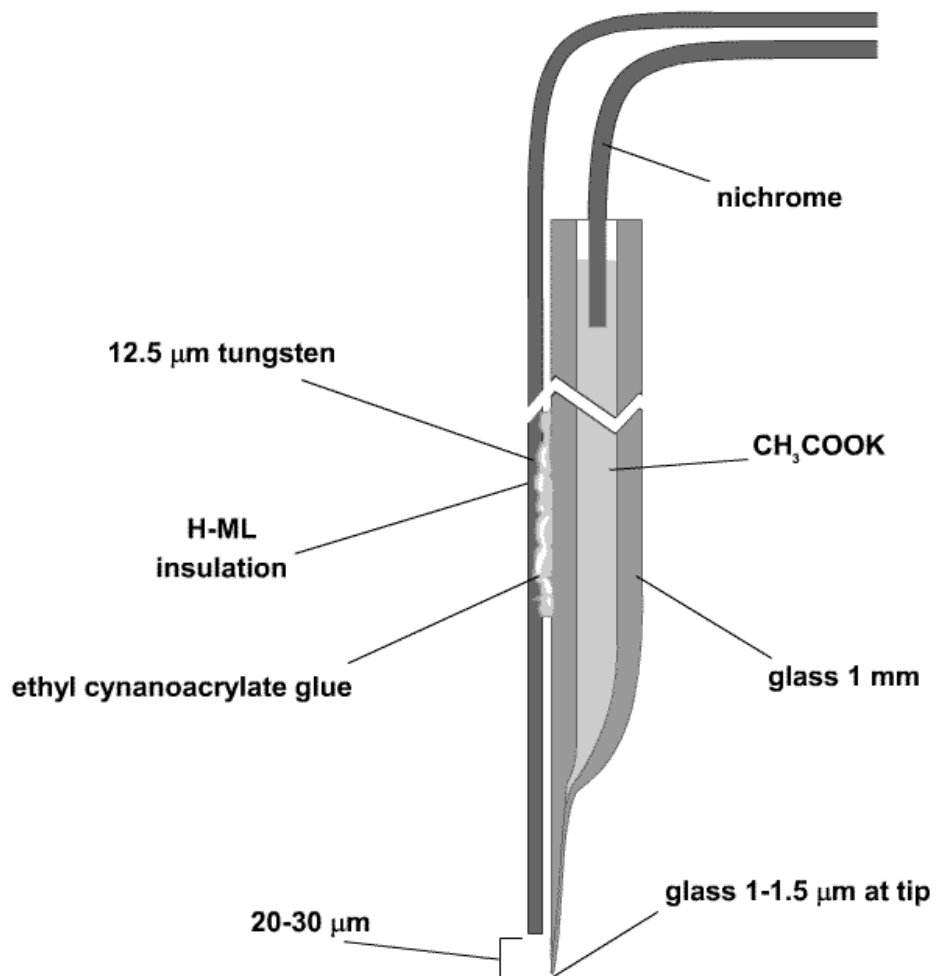

Supplement: NIHMS1712022-supplement-Supplementary_material.pdf [file NIHMS1712022-supplement-Supplementary_material.pdf]
